# Supplementary material for: Genetic Mutations Associated with Inflammatory Response Caused by HPV Integration in Oropharyngeal Squamous Cell Carcinoma
Source: MDPI journal article supplement (doi:10.3390/biomedicines12010024), 2023-12-21
Supplement: s1 [file s1]

## Supplemental Tables & Figures

**Supplemental Table S1:** Data extraction of the included articles in the scoping review. The 38 articles present the list of HPV-positive (+) and HPV-negative (-) mutated genes. 2 articles out of the 38 articles screened have included both lists of genes. However, the rest included HPV + mutated genes which this scoping review mainly highlights. 330 genes were identified and submitted to enriched analysis. *TP53* (n= 22) and *PIK3CA* (n= 20) genes were the most mutated genes in HPV-related OPC cases.

| AUTHOR, YEAR                                      | HPV + GENES MUTATED                                                                                                                                                                                                                                                                                                                                                                                                                                                                                                       | HPV - GENES MUTATED                                                                                                                                                                                                  |
|---------------------------------------------------|---------------------------------------------------------------------------------------------------------------------------------------------------------------------------------------------------------------------------------------------------------------------------------------------------------------------------------------------------------------------------------------------------------------------------------------------------------------------------------------------------------------------------|----------------------------------------------------------------------------------------------------------------------------------------------------------------------------------------------------------------------|
| 1. R. Alex Harbison et al., 2018                  | KMT2D, FGFR3, CYLD, EP300, PIK3CA, RB1, PEG3, STAT3, TTSC2, B2M, CREBBP, FBXW7, FLT1, NCOR1, NSD1, PTEN, USP9X, BRIP1, NBN, NFE2L2, TACC3, ARID1B, ARID5B, DDR2, EPHA2, FANCA, KDM5C, LRRK2, MAP2K2, MAPK1, NOTCH3, PTPRD, SMAD2, SYK, TRAF3, TRRAP, FLT1, IDH2, AR, ASXL1, ATM, AXIN1, BAP1, BCR, CIC, ELF3, FANCA, FAT1, FLT4, GRIN2A, HDAC4, HIF1A, IFNGR1, KMT2D, LRP2, MAP3K5, MED12, MTOR, NBN, PIK3R6, RB1, SRC, TACC3, TRRAP, TSC2, XPO1.<br><b>RECURRENT OPSCCS:-</b> TP53, CASP8, FAT1, HLA-A, AJUBA, AND NSD1. |                                                                                                                                                                                                                      |
| 2. Chung, C. H. et al., 2015                      | IK3CA, SOX2, MLL2 (KMT2D), RB1, BCL6, EP300, NOTCH1, PTEN, FGFR3, ASXL1, KLHL6, FBXW7, TP53, ATM, BRCA2, BRIP1 (BACH1), LRP1B, ATRX, KDM6A, BRCA1, BLM, JAK2, NF1, HRAS, MYC, ATR, FGF19, FGF3, FGF4, RICTOR                                                                                                                                                                                                                                                                                                              | TP53, CDKN2A/B, FGF19, FGF3, FGF4, PIK3CA, CCND1, NOTCH1, LRP1B, SOX2, MLL2 (KMT2D), EGFR, KLHL6, BCL6, ATR, NFE2L2, NOTCH2, MYC, FGFR1, ATRX, JAK2, SMAD4, RICTOR, ZNF703, BRCA2, FOXL2, PRKDC, GPR124, KDM6A, APC. |
| 3. Doerstling, S. et al., 2023                    | ATM, CCND1, CDKN2A, RB1, EGFR, FBXW7, FGFR1, FGFR2, FGFR3, IDH1, KRAS, NRAS, HRAS, NOTCH1<br>AKT1, MTOR, PIK3CA, PTEN, TP53, AR, ALK., BRAF, BRCA1, BRCA2, CDK/RB PATHWAY (CCND1, CDKN2A, RB1), FGFR1-4, FLT3, JAK2, MET, MLH1, MSH2, MSH6, PI3K PATHWAY (AKT1, MTOR, PIK3CA, PTEN).                                                                                                                                                                                                                                      |                                                                                                                                                                                                                      |
| 4. Dogan, S. et al., 2019                         | TP53, SOX2, CDKN2A/2B, PIK3CA, TP63, KMT2D , NOTCH1, FAT1, 11Q13 GENE CLUSTER (FGF3/FGF4/FGF19/CCND1) , FOXA1, NOTCH PATHWAY GENES (NOTCH1, NOTCH2, NOTCH3, NOTCH4, EP300, FBXW7, SPEN, KDM5A), HISTONE MODIFIERS (KMT2D, CREBBP, KMT2C, EP300, KMT2A). NFE2L2, KEAP1, CUL3, EGFR, ERBB2, FGFR1, FGFR3, FOXA1, TERT, NKX2-1, FGFR1, PMAIP1, ERBB2, EGFR, YAP1, ATM, MYC, KEAP1, CASP8, CUL3. JAK3. MAP3K13, FOXA1, HRAS, CCND1.PIK3/AKT/MTOR PATHWAY. FAT1, RUNX1.                                                        |                                                                                                                                                                                                                      |
| 5. Dubot, C. et al., 2018                         | CDKN2B, RB1,MDM2, RICTOR, PI3K, KRAS, NRAS, MAPK, AJUBA, SYNE2, USP9X, KDM6A, NSD1, LRP1B. CELL CYCLE PATHWAY (TP53, CCND1, CDKN2A), PI3K/AKT/MTOR PATHWAY (PIK3CA), TYROSINE KINASE RECEPTORS (EGFR, FGFR1), CELL DIFFERENTIATION (FAT1, NOTCH1).                                                                                                                                                                                                                                                                        |                                                                                                                                                                                                                      |
| 6. Gieber-Netto, F. O. et al., 2018               | TP53, NOTCH1, CDKN2A, NOTCH2, PIK3CA, FAT1, FBXW7, KEAP1, NFE2L2, NSD1, TP63, EGFR, HRAS, CASP8, CCND1, TGFBR2                                                                                                                                                                                                                                                                                                                                                                                                            |                                                                                                                                                                                                                      |
| 7. Gronhøj, C. et al., 2018                       | APOB, BIRC6, SPTBN1, FAT2, KMT2A, FAT1, BPTF, TRIO, HERC2, KALRN, ZNRF3, BNC2, NOTCH2, FGFR2, SMAD2, AR, SIN3A, PTCH1, DNMT3A, ARHGAP35, F5, IGF1R, CATSPER1, IQGAP1, SFMBT2, MET, DUBP1, TENM2, TSC1, ARID5B, FAT2, FNDC1, BIRC6, PTPN14, QSER1, ALS2CL, PIK3CB, ARID2, NOTCH3, APOB, FGFR1, NF2, NRXN3, MYH9, PRPF8, FOXP1, PEX2, PBRM1, IPO7, SPTA1, TRIO, ABCG1, TJP2, EP300, RET, SLX4, AKT2, FN1, HCFC1, PCDH18, WHSC1, BPTF, CREBBP                                                                                |                                                                                                                                                                                                                      |
| 8. Haft, S. et al., 2019                          | PIK3CA, KMT2C, FBXW7, FGFR3, CREBBP, FAT1, NSD1, KMT2D, NOTCH1, CASP8, CLTCL1, EPHA2, HLA-A, HRAS, PDE4DIP, PTCH1, PTEN ZNF750, ADCY4, AJUBA, ATM, CTCF, CUL3, FANCA, MET, LRP1B, CASZ1, CYLD, EP300, KALRN, MACF1, ASXL3, CSMD3, DST, FLNC, HUWE1, KIAA1407, ASPM, DNAH5, FAM135B, HERC1, HFM1, LRRC37B, MAP1B, MUC4, MUC5B, POLR3A, TRAF3, SERPINB5, USP6, FLG                                                                                                                                                          |                                                                                                                                                                                                                      |
| 9. Koncar, R. F. et al., 2017                     | ABL1, AKT1, ALK, APC, ATM, BRAF, BRCA1, BRCA2, CDH1, C-KIT, CMET, CSF1R, CTNNB1, EGFR, ERBB2, ERBB4, FBXW7, FGFR1, FGFR2, FLT3, GNAI1, GNAQ, GNAS, HNF1A, HRAS, IDH1, JAK2, JAK3, KDR, KRAS, MLH1, MPL, NOTCH1, NPM1, NRAS, PDGFRA, PIK3CA, PTEN, PTPN11, RB1, RET, SMAD4, SMARCB1, SMO, STK11, TP53, VHL.                                                                                                                                                                                                                |                                                                                                                                                                                                                      |
| 10. Labarge, B. et al., 2022                      | FLG, PIK3CA, MUC12, ZNF750, USE1, KMT2D, MUC6, TP63, SLITRK3, NLRC5, MORN1, EFN2, HLA-A, KRTAP1-I, B2M, PXN, CDKN2A, RB1, TRAF3, PTEN.                                                                                                                                                                                                                                                                                                                                                                                    |                                                                                                                                                                                                                      |
| 11. Lim, S. M. et al., 2019<br>Multicentric study | TP53, CDKN2A, CCND1, PIK3CA, KMT2C, FAT1, RELN, FAT4, CDKN2B, EGFR, KMT2D, NFE2L2, ADGRV1, NOTCH1, FAT2, CTTN, MYC, GNAS, EPHB4, ASXL3, CHD4, SOX2, ASXL1, KEAP1, AR, NOTCH2, KLHL6, TERT, KRAS, PTEN, MAP3K9, CDH9, CDH1, HPV                                                                                                                                                                                                                                                                                            |                                                                                                                                                                                                                      |
| 12. Qin, T. et al., 2018                          | PDE4DIP, FAT1, NOTCH2, AHNAK, NUMA1, MKI67, ABCC3, ABCC1, PRKDC, TP53, MUC16, NRGI1, TIAM1, NOTCH3, CASP8, CEP290, KLRC2, MAP3K1, NBAS, PTPRB                                                                                                                                                                                                                                                                                                                                                                             |                                                                                                                                                                                                                      |
| 13. Reder, H. et al., 2019                        | TP53, RB1, STK11, CDH1, HRAS, KRAS, NRAS, FAT1, PIK3CA, PIK3R1, PTEN, FANCA, FBXW7, CYLD, BCL6, TP63, TAF1, EP300, DDX3X, NOTCH1, JAK1, JAK2, PDGFRA.                                                                                                                                                                                                                                                                                                                                                                     |                                                                                                                                                                                                                      |
| 14. Reder, H. et al., 2021.                       | TP53, RB1, STK11, CDH1, HRAS, KRAS, NRAS, FAT1, PIK3CA, PIK3R1, PTEN, FANCA, FBXW7, CYLD, BCL6, TP63, TAF1, EP300, DDX3X, NOTCH1, JAK1, JAK2, PDGFRA.                                                                                                                                                                                                                                                                                                                                                                     |                                                                                                                                                                                                                      |
| 15. Saba, N. F. et al., 2020                      | PIK3CA, TP53, KMT2A, GNAQ, KDM6A, LAMA2, PTEN, DDX3X, BRCA1, BRCA2, ABCC2, CHD7, ERBB3, H3F3A, INPP4B, RB1, JAK2, NF1, PDGFRA, ALK, FGFR2, MAP2K2, MAPK1, MET, RET, ROS1, SOS1, FLT3, KIT, KRAS, PTEN, INPP4B, AKT1, AKT2, MTOR, PIK3R1, RPS6KB1                                                                                                                                                                                                                                                                          |                                                                                                                                                                                                                      |
| 16. Wahle, B. M. et al., 2022                     | PIK3CA, FGFR3, ZNF750, SYNE2, FLG, SYNE1, PLXNA1, PLEC, HERC1, ZFH4, VPS8, USH2A, TRAF3, TACC2, RYR3, PTEN, OTOG, LAMA2, KIAA1109, JRK, FBN3, EP300, DNAH5, DNAH14,                                                                                                                                                                                                                                                                                                                                                       |                                                                                                                                                                                                                      |

|     |                                                                                                    |                                                                                                                                                                                                                                                                                        |
|-----|----------------------------------------------------------------------------------------------------|----------------------------------------------------------------------------------------------------------------------------------------------------------------------------------------------------------------------------------------------------------------------------------------|
|     | CUX1, BIRC5, AK5, SMARCA1, PIK3R1, IQCG, METTL24, FBXW7, B2M, NRAS, IFI27, HLA-B, FGF2, AKT1, FGF8 |                                                                                                                                                                                                                                                                                        |
| 17. | <b>Stransky, N. et al., 2011</b>                                                                   | TP53, CDKN2A, CASP8, FAT1, NOTCH1, PTEN, SYNE1, HRAS, PIK3CA, MED1, MLL2, TP63, IRF6, EZH2, SYNE2, NOTCH3, RIPK4, NOTCH2, DICER1, RB1.                                                                                                                                                 |
| 18. | <b>Williams, E. A. et al., 2021</b>                                                                | PIK3CA, KMT2D, FBXW7, PTEN, KMT2C, TP53, BCL2L1, NOTCH1, RB1, HPV16                                                                                                                                                                                                                    |
| 19. | <b>Antonsson, A. et al., 2016</b>                                                                  | EVER1 & EVER2                                                                                                                                                                                                                                                                          |
| 20. | <b>Barten, M. et al., 1995</b>                                                                     | P53 MUTATION                                                                                                                                                                                                                                                                           |
| 21. | <b>Benzerdjeb, N. et al., 2021</b>                                                                 | TP53 MUTATIONS.                                                                                                                                                                                                                                                                        |
| 22. | <b>Chen, Z. et al., 2021</b>                                                                       | FAT1 MUTATIONS.                                                                                                                                                                                                                                                                        |
| 23. | <b>Chiosea, S. I. et al., 2013</b>                                                                 | PIK3CA, HRAS AND PTEN GENE MUTATIONS.                                                                                                                                                                                                                                                  |
| 24. | <b>Ekalakasananan, T. et al., 2020</b>                                                             | P53 R282 GENE MUTATIONS.                                                                                                                                                                                                                                                               |
| 25. | <b>Fallai, C. et al., 2009</b>                                                                     | TP53 MUTATIONS.                                                                                                                                                                                                                                                                        |
| 26. | <b>Farnebo, L. et al., 2015</b>                                                                    | DNA REPAIR GENES XPC, XPD, XRCC1, XRCC3 AND HPV, P53 MUTATIONS.                                                                                                                                                                                                                        |
| 27. | <b>Hong, A. et al., 2016</b>                                                                       | P53 MUTATIONS.                                                                                                                                                                                                                                                                         |
| 28. | <b>Cortelazzi, B. et al., 2015</b>                                                                 | PIK3CA, PTEN, IGF1R, IGF1, IGF2, HER2, HER3.                                                                                                                                                                                                                                           |
| 29. | <b>De Carvalho, A. C. et al., 2019</b>                                                             | TP53 MUTATIONS.                                                                                                                                                                                                                                                                        |
| 30. | <b>Friedland, P. et al., 2012</b>                                                                  | EGFR, KRAS, BRAF.                                                                                                                                                                                                                                                                      |
| 31. | <b>Ghosh, A. et al., 2013</b>                                                                      | PHF2 , FANCC, PTCH1 ALTERATIONS                                                                                                                                                                                                                                                        |
| 32. | <b>Gross, A. M. et al., 2014</b>                                                                   | TP53 MUTATIONS, CASP8                                                                                                                                                                                                                                                                  |
| 33. | <b>Huang, C. et al., 2019</b>                                                                      | NSD1, NOTCH1, TP53, CDKN2A, PIK3CA                                                                                                                                                                                                                                                     |
| 34. | <b>Licitra, L. et al., 2006</b>                                                                    | TP53 MUTATIONS.                                                                                                                                                                                                                                                                        |
| 35. | <b>Mazurek, A. M. et al., 2016</b>                                                                 | KRAS, EGFR GENE MUTATIONS                                                                                                                                                                                                                                                              |
| 36. | <b>Saba, N. F. et al., 2015<br/>Pilot Study</b>                                                    | CDKM2C, SYK, WNT10B, CEBPA, MAP3K8, FGR, GATA1, OL4, PDGFA, CDKN2A, E2F2, TP53, PIK3CA, FGFR3, RB1, MET                                                                                                                                                                                |
| 37. | <b>Sewell, A. et al., 2014</b>                                                                     | PIK3CA MUTATIONS                                                                                                                                                                                                                                                                       |
| 38. | <b>Shaikh, H. et al., 2021</b>                                                                     | PIK3CA, KMT2D, TP53, LOH, KMT2C, CYLD, FBXW7, NOTCH1, RB1, PIK3CB, PTEN, B2M, NF1, ASXL1, KDM6A, PIK3R2, CHEK2, NSD1, FAT1, MAPK1, CREBBP.<br>TERT, TP53, PIK3CA, RB1, NOTCH1, ARID1A, NF1, KMT2D, FAT1, LOH, ASXL1, KMT2C, CDKN2A, FBXW7, ATM, FGFR3, KDM6A, FANCM, EP300, B2M, KRAS. |

**Supplementary Table S2:** Distribution of the OSCC cases according to demographic, lifestyle, and clinical variables.

| Variable                 | Category  | Paraffin-<br>embedded<br>samples n(%) | HELA2 n (%)    |               | <i>P-value</i> |
|--------------------------|-----------|---------------------------------------|----------------|---------------|----------------|
|                          |           |                                       | Negative       | Positive      |                |
| Age                      | < 50 year | 8 (15.4)                              | 7 (16.7)       | 1 (10)        | 0.599          |
|                          | ≥ 50 year | 44 (84.6)                             | 35 (83.3)      | 9 (90)        |                |
| Gender                   | Male      | 31 (59.6)                             | 26 (61.9)      | 5 (50)        | 0.500          |
|                          | Female    | 21 (40.4)                             | 16 (38.1)      | 5 (50)        |                |
| Smoking habit            | No        | 23 (44.2)                             | 21 (53.8)      | 2 (22.2)      | 0.087          |
|                          | Yes       | 29 (55.8)                             | 18 (46.2)      | 7 (77.8)      |                |
| Alcohol consumption      | No        | 16 (37.2)                             | 13 (37.1)      | 3 (37.5)      | 0.985          |
|                          | Yes       | 27 (62.8)                             | 22 (62.9)      | 5 (62.5)      |                |
| Clinical stage           | T1+T2     | 32 (61.5)                             | <b>29 (69)</b> | <b>3 (30)</b> | <b>0.023</b>   |
|                          | T3+T4     | 20 (38.5)                             | <b>13 (31)</b> | <b>7 (70)</b> |                |
| Lymph nodes              | N0        | 40 (76.9)                             | 34 (81)        | 6 (60)        | 0.158          |
|                          | N+        | 12 (23.1)                             | 8 (19)         | 4 (40)        |                |
| Recurrence or metastasis | No        | 40 (76.9)                             | 31 (73.8)      | 9 (90)        | 0.275          |
|                          | Yes       | 12 (23.1)                             | 11 (26.2)      | 1 (10)        |                |
| Status                   | Alive     | 45 (86.5)                             | 37 (88.1)      | 8 (80)        | 0.500          |
|                          | Dead      | 7 (13.5)                              | 5 (11.9)       | 2 (20)        |                |



| Gene       | Count | Category |
|------------|-------|----------|
| 66 BCR     | 1     | High     |
| 67 CIC     | 1     | High     |
| 68 ELF3    | 1     | High     |
| 69 FLT4    | 1     | High     |
| 70 GRIN2A  | 1     | High     |
| 71 HDAC4   | 1     | High     |
| 72 HIF1A   | 1     | High     |
| 73 IFNGR1  | 1     | High     |
| 74 LRP2    | 1     | High     |
| 75 MAP3K5  | 1     | High     |
| 76 MED12   | 1     | High     |
| 77 MTOR    | 3     | High     |
| 78 NBN     | 1     | High     |
| 79 PIK3R6  | 1     | High     |
| 80 SRC     | 1     | High     |
| 81 TSC2    | 2     | High     |
| 82 XPO1    | 1     | High     |
| 83 HLA-A   | 3     | High     |
| 84 AJUBA   | 2     | High     |
| 85 NSD1    | 4     | High     |
| 86 BRIP1   | 1     | High     |
| 87 STK11   | 3     | High     |
| 88 PIK3R1  | 3     | High     |
| 89 PIK3CA  | 2     | High     |
| 90 SOX2    | 3     | High     |
| 91 BCL6    | 3     | High     |
| 92 KLHL6   | 2     | High     |
| 93 BRCA2   | 4     | High     |
| 94 ATRX    | 1     | High     |
| 95 KDM6A   | 4     | High     |
| 96 BRCA1   | 4     | High     |
| 97 BLM     | 1     | High     |
| 98 JAK2    | 6     | High     |
| 99 NF1     | 3     | High     |
| 100 ATR    | 1     | High     |
| 101 FGF19  | 2     | High     |
| 102 FGF3   | 2     | High     |
| 103 FGF4   | 2     | High     |
| 104 RICTOR | 2     | High     |
| 105 FGFR2  | 4     | High     |
| 106 IDH1   | 2     | High     |
| 107 NRAS   | 6     | High     |
| 108 AKT1   | 4     | High     |
| 109 ALK    | 3     | High     |
| 110 BRAF   | 3     | High     |
| 111 FGFR4  | 1     | High     |
| 112 FLT3   | 2     | High     |
| 113 MET    | 5     | High     |
| 114 MLH1   | 2     | High     |
| 115 MSH2   | 1     | High     |
| 116 MSH6   | 1     | High     |
| 117 RUNX1  | 1     | High     |
| 118 CDKN2B | 3     | High     |
| 119 FOXA1  | 1     | High     |
| 120 SPEN   | 1     | High     |
| 121 KDM5A  | 1     | High     |
| 122 KMT2C  | 5     | High     |
| 123 KMT2A  | 3     | High     |
| 124 KEAP1  | 3     | High     |

| Gene         | Count | Category |
|--------------|-------|----------|
| 125 CUL3     | 2     | Orange   |
| 126 ERBB2    | 2     | Red      |
| 127 TERT     | 3     | Pink     |
| 128 NXX2     | 1     | Yellow   |
| 129 NXX1     | 1     | Yellow   |
| 130 PMA1P1   | 1     | Orange   |
| 131 YAP1     | 1     | Orange   |
| 132 JAK3     | 2     | Red      |
| 133 MAP3K13  | 1     | Orange   |
| 134 MDM2     | 1     | Purple   |
| 135 PI3K     | 1     | Purple   |
| 136 MAPK     | 1     | Yellow   |
| 137 SYNE2    | 3     | Grey     |
| 138 TGFBR2   | 1     | Black    |
| 139 IQGAP1   | 1     | Green    |
| 140 APOB     | 1     | Green    |
| 141 BIRC6    | 1     | Green    |
| 142 SPTBN1   | 1     | Green    |
| 143 FAT2     | 2     | Pink     |
| 144 BPTF     | 1     | Green    |
| 145 TRIO     | 1     | Green    |
| 146 HERC2    | 1     | Green    |
| 147 KALRN    | 2     | Cyan     |
| 148 ZNRF3    | 1     | Cyan     |
| 149 BNC2     | 1     | Green    |
| 150 SIN3A    | 1     | Cyan     |
| 151 PTCH1    | 3     | Cyan     |
| 152 DNMT3A   | 1     | Red      |
| 153 APHGAP35 | 1     | Green    |
| 154 F5       | 1     | Green    |
| 155 IGF1R    | 2     | Cyan     |
| 156 CATSPER1 | 1     | Green    |
| 157 SFMBT2   | 1     | Green    |
| 158 DUBP1    | 1     | Green    |
| 159 TENM2    | 1     | Green    |
| 160 TSC1     | 1     | Green    |
| 161 FNDC1    | 1     | Green    |
| 162 PTPN14   | 1     | Green    |
| 163 QSER1    | 1     | Green    |
| 164 ALS2CL   | 1     | Green    |
| 165 ARID2    | 1     | Green    |
| 166 NF2      | 1     | Green    |
| 167 NRXN3    | 1     | Green    |
| 168 MYH9     | 1     | Green    |
| 169 PRPF8    | 1     | Green    |
| 170 FOXP1    | 1     | Green    |
| 171 PEX2     | 1     | Green    |
| 172 PBRM1    | 1     | Green    |
| 173 IPO7     | 1     | Green    |
| 174 SPTA1    | 1     | Green    |
| 175 ABCG1    | 1     | Green    |
| 176 TJP2     | 1     | Green    |
| 177 RET      | 3     | Red      |
| 178 SLX4     | 1     | Cyan     |
| 179 AKT2     | 2     | Cyan     |
| 180 FN1      | 1     | Orange   |
| 181 HCFC1    | 1     | Green    |
| 182 PCDH18   | 1     | Green    |
| 183 WHSC1    | 1     | Green    |
| 184 CLTCL1   | 1     | Cyan     |
| 185 PDE4DIP  | 2     | Orange   |
| 186 ADCY4    | 1     | Green    |
| 187 CTCF     | 1     | Cyan     |

|     |       |   |  |  |  |  |  |  |  |  |  |  |  |  |  |  |  |  |  |  |  |  |  |  |  |  |  |  |  |  |  |  |  |  |  |  |  |  |  |  |  |  |  |  |  |  |  |  |  |  |  |  |  |  |  |  |  |  |  |  |  |  |  |  |  |  |  |  |  |  |  |  |  |  |  |  |  |  |  |  |  |  |  |  |  |  |  |  |  |  |  |  |  |  |  |  |  |  |  |  |  |  |  |  |  |  |  |  |  |  |  |  |  |  |  |  |  |  |  |  |  |  |  |  |  |  |  |  |  |  |  |  |  |  |  |  |  |  |  |  |  |  |  |  |  |  |  |  |  |  |  |  |  |  |  |  |  |  |  |  |  |  |  |  |  |  |  |  |  |  |  |  |  |  |  |  |  |  |  |  |  |  |  |  |  |  |  |  |  |  |  |  |  |  |  |  |  |  |  |  |  |  |  |  |  |  |  |  |  |  |  |  |  |  |  |  |  |  |  |  |  |  |  |  |  |  |  |  |  |  |  |  |  |  |  |  |  |  |  |  |  |  |  |  |  |  |  |  |  |  |  |  |  |  |  |  |  |  |  |  |  |  |  |  |  |  |  |  |  |  |  |  |  |  |  |  |  |  |  |  |  |  |  |  |  |  |  |  |  |  |  |  |  |  |  |  |  |  |  |  |  |  |  |  |  |  |  |  |  |  |  |  |  |  |  |  |  |  |  |  |  |  |  |  |  |  |  |  |  |  |  |  |  |  |  |  |  |  |  |  |  |  |  |  |  |  |  |  |  |  |  |  |  |  |  |  |  |  |  |  |  |  |  |  |  |  |  |  |  |  |  |  |  |  |  |  |  |  |  |  |  |  |  |  |  |  |  |  |  |  |  |  |  |  |  |  |  |  |  |  |  |  |  |  |  |  |  |  |  |  |  |  |  |  |  |  |  |  |  |  |  |  |  |  |  |  |  |  |  |  |  |  |  |  |  |  |  |  |  |  |  |  |  |  |  |  |  |  |  |  |  |  |  |  |  |  |  |  |  |  |  |  |  |  |  |  |  |  |  |  |  |  |  |  |  |  |  |  |  |  |  |  |  |  |  |  |  |  |  |  |  |  |  |  |  |  |  |  |  |  |  |  |  |  |  |  |  |  |  |  |  |  |  |  |  |  |  |  |  |  |  |  |  |  |  |  |  |  |  |  |  |  |  |  |  |  |  |  |  |  |  |  |  |  |  |  |  |  |  |  |  |  |  |  |  |  |  |  |  |  |  |  |  |  |  |  |  |  |  |  |  |  |  |  |  |  |  |  |  |  |  |  |  |  |  |  |  |  |  |  |  |  |  |  |  |  |  |  |  |  |  |  |  |  |  |  |  |  |  |  |  |  |  |  |  |  |  |  |  |  |  |  |  |  |  |  |  |  |  |  |  |  |  |  |  |  |  |  |  |  |  |  |  |  |  |  |  |  |  |  |  |  |  |  |  |  |  |  |  |  |  |  |  |  |  |  |  |  |  |  |  |  |  |  |  |  |  |  |  |  |  |  |  |  |  |  |  |  |  |  |  |  |  |  |  |  |  |  |  |  |  |  |  |  |  |  |  |  |  |  |  |  |  |  |  |  |  |  |  |  |  |  |  |  |  |  |  |  |  |  |  |  |  |  |  |  |  |  |  |  |  |  |  |  |  |  |  |  |  |  |  |  |  |  |  |  |  |  |  |  |  |  |  |  |  |  |  |  |  |  |  |  |  |  |  |  |  |  |  |  |  |  |  |  |  |  |  |  |  |  |  |  |  |  |  |  |  |  |  |  |  |  |  |  |  |  |  |  |  |  |  |  |  |  |  |  |  |  |  |  |  |  |  |  |  |  |  |  |  |  |  |  |  |  |  |  |  |  |  |  |  |  |  |  |  |  |  |  |  |  |  |  |  |  |  |  |  |  |  |  |  |  |  |  |  |  |  |  |  |  |  |  |  |  |  |  |  |  |  |  |  |  |  |  |  |  |  |  |  |  |  |  |  |  |  |  |  |  |  |  |  |  |  |  |  |  |  |  |  |  |  |  |  |  |  |  |  |  |  |  |  |  |  |  |  |  |  |  |  |  |  |  |  |  |  |  |  |  |  |  |  |  |  |  |  |  |  |  |  |  |  |  |  |  |  |  |  |  |  |  |  |  |  |  |  |  |  |  |  |  |  |  |  |  |  |  |  |  |  |  |  |  |  |  |  |  |  |  |  |  |  |  |  |  |  |  |  |  |  |  |  |  |  |  |  |  |  |  |  |  |  |  |  |  |  |  |  |  |  |  |  |  |  |  |  |  |  |  |  |  |  |  |  |  |  |  |  |  |  |  |  |  |  |  |  |  |  |  |  |  |  |  |  |  |  |  |  |  |  |  |  |  |  |  |  |  |  |  |  |  |  |  |  |  |  |  |  |  |  |  |  |  |  |  |  |  |  |  |  |  |  |  |  |  |  |  |  |  |  |  |  |  |  |  |  |  |  |  |  |  |  |  |  |  |  |  |  |  |  |  |  |  |  |  |  |  |  |  |  |  |  |  |  |  |  |  |  |  |  |  |  |  |  |  |  |  |  |  |  |  |  |  |  |  |  |  |  |  |  |  |  |  |  |  |  |  |  |  |  |  |  |  |  |  |  |  |  |  |  |  |  |  |  |  |  |  |  |  |  |  |  |  |  |  |  |  |  |  |  |  |  |  |  |  |  |  |  |  |  |  |  |  |  |  |  |  |  |  |  |  |  |  |  |  |  |  |  |  |  |  |  |  |  |  |  |  |  |  |  |  |  |  |  |  |  |  |  |  |  |  |  |  |  |  |  |  |  |  |  |  |  |  |  |  |  |  |  |  |  |  |  |  |  |  |  |  |  |  |  |  |  |  |  |  |  |  |  |  |  |  |  |  |  |  |  |  |  |  |  |  |  |  |  |  |  |  |  |  |  |  |  |  |  |  |  |  |  |  |  |  |  |  |  |  |  |  |  |  |  |  |  |  |  |  |  |  |  |  |  |  |  |  |  |  |  |  |  |  |  |  |  |  |  |  |  |  |  |  |  |  |  |  |  |    |
|-----|-------|---|--|--|--|--|--|--|--|--|--|--|--|--|--|--|--|--|--|--|--|--|--|--|--|--|--|--|--|--|--|--|--|--|--|--|--|--|--|--|--|--|--|--|--|--|--|--|--|--|--|--|--|--|--|--|--|--|--|--|--|--|--|--|--|--|--|--|--|--|--|--|--|--|--|--|--|--|--|--|--|--|--|--|--|--|--|--|--|--|--|--|--|--|--|--|--|--|--|--|--|--|--|--|--|--|--|--|--|--|--|--|--|--|--|--|--|--|--|--|--|--|--|--|--|--|--|--|--|--|--|--|--|--|--|--|--|--|--|--|--|--|--|--|--|--|--|--|--|--|--|--|--|--|--|--|--|--|--|--|--|--|--|--|--|--|--|--|--|--|--|--|--|--|--|--|--|--|--|--|--|--|--|--|--|--|--|--|--|--|--|--|--|--|--|--|--|--|--|--|--|--|--|--|--|--|--|--|--|--|--|--|--|--|--|--|--|--|--|--|--|--|--|--|--|--|--|--|--|--|--|--|--|--|--|--|--|--|--|--|--|--|--|--|--|--|--|--|--|--|--|--|--|--|--|--|--|--|--|--|--|--|--|--|--|--|--|--|--|--|--|--|--|--|--|--|--|--|--|--|--|--|--|--|--|--|--|--|--|--|--|--|--|--|--|--|--|--|--|--|--|--|--|--|--|--|--|--|--|--|--|--|--|--|--|--|--|--|--|--|--|--|--|--|--|--|--|--|--|--|--|--|--|--|--|--|--|--|--|--|--|--|--|--|--|--|--|--|--|--|--|--|--|--|--|--|--|--|--|--|--|--|--|--|--|--|--|--|--|--|--|--|--|--|--|--|--|--|--|--|--|--|--|--|--|--|--|--|--|--|--|--|--|--|--|--|--|--|--|--|--|--|--|--|--|--|--|--|--|--|--|--|--|--|--|--|--|--|--|--|--|--|--|--|--|--|--|--|--|--|--|--|--|--|--|--|--|--|--|--|--|--|--|--|--|--|--|--|--|--|--|--|--|--|--|--|--|--|--|--|--|--|--|--|--|--|--|--|--|--|--|--|--|--|--|--|--|--|--|--|--|--|--|--|--|--|--|--|--|--|--|--|--|--|--|--|--|--|--|--|--|--|--|--|--|--|--|--|--|--|--|--|--|--|--|--|--|--|--|--|--|--|--|--|--|--|--|--|--|--|--|--|--|--|--|--|--|--|--|--|--|--|--|--|--|--|--|--|--|--|--|--|--|--|--|--|--|--|--|--|--|--|--|--|--|--|--|--|--|--|--|--|--|--|--|--|--|--|--|--|--|--|--|--|--|--|--|--|--|--|--|--|--|--|--|--|--|--|--|--|--|--|--|--|--|--|--|--|--|--|--|--|--|--|--|--|--|--|--|--|--|--|--|--|--|--|--|--|--|--|--|--|--|--|--|--|--|--|--|--|--|--|--|--|--|--|--|--|--|--|--|--|--|--|--|--|--|--|--|--|--|--|--|--|--|--|--|--|--|--|--|--|--|--|--|--|--|--|--|--|--|--|--|--|--|--|--|--|--|--|--|--|--|--|--|--|--|--|--|--|--|--|--|--|--|--|--|--|--|--|--|--|--|--|--|--|--|--|--|--|--|--|--|--|--|--|--|--|--|--|--|--|--|--|--|--|--|--|--|--|--|--|--|--|--|--|--|--|--|--|--|--|--|--|--|--|--|--|--|--|--|--|--|--|--|--|--|--|--|--|--|--|--|--|--|--|--|--|--|--|--|--|--|--|--|--|--|--|--|--|--|--|--|--|--|--|--|--|--|--|--|--|--|--|--|--|--|--|--|--|--|--|--|--|--|--|--|--|--|--|--|--|--|--|--|--|--|--|--|--|--|--|--|--|--|--|--|--|--|--|--|--|--|--|--|--|--|--|--|--|--|--|--|--|--|--|--|--|--|--|--|--|--|--|--|--|--|--|--|--|--|--|--|--|--|--|--|--|--|--|--|--|--|--|--|--|--|--|--|--|--|--|--|--|--|--|--|--|--|--|--|--|--|--|--|--|--|--|--|--|--|--|--|--|--|--|--|--|--|--|--|--|--|--|--|--|--|--|--|--|--|--|--|--|--|--|--|--|--|--|--|--|--|--|--|--|--|--|--|--|--|--|--|--|--|--|--|--|--|--|--|--|--|--|--|--|--|--|--|--|--|--|--|--|--|--|--|--|--|--|--|--|--|--|--|--|--|--|--|--|--|--|--|--|--|--|--|--|--|--|--|--|--|--|--|--|--|--|--|--|--|--|--|--|--|--|--|--|--|--|--|--|--|--|--|--|--|--|--|--|--|--|--|--|--|--|--|--|--|--|--|--|--|--|--|--|--|--|--|--|--|--|--|--|--|--|--|--|--|--|--|--|--|--|--|--|--|--|--|--|--|--|--|--|--|--|--|--|--|--|--|--|--|--|--|--|--|--|--|--|--|--|--|--|--|--|--|--|--|--|--|--|--|--|--|--|--|--|--|--|--|--|--|--|--|--|--|--|--|--|--|--|--|--|--|--|--|--|--|--|--|--|--|--|--|--|--|--|--|--|--|--|--|--|--|--|--|--|--|--|--|--|--|--|--|--|--|--|--|--|--|--|--|--|--|--|--|--|--|--|--|--|--|--|--|--|--|--|--|--|--|--|--|--|--|--|--|--|--|--|--|--|--|--|--|--|--|--|--|--|--|--|--|--|--|--|--|--|--|--|--|--|--|--|--|--|--|--|--|--|--|--|--|--|--|--|--|--|--|--|--|--|--|--|--|--|--|--|--|--|--|--|--|--|--|--|--|--|--|--|--|--|--|--|--|--|--|--|--|--|--|--|--|--|--|--|--|--|--|--|--|--|--|--|--|--|--|--|--|--|--|--|--|--|--|--|--|--|--|--|--|--|--|--|--|--|--|--|--|--|--|--|--|--|--|--|--|--|--|--|--|--|--|--|--|--|--|--|--|--|--|--|--|--|--|--|--|--|--|--|--|--|--|--|--|--|--|--|--|--|--|--|--|--|--|--|--|--|--|--|--|--|--|--|--|--|--|--|--|--|--|--|--|----|
| 188 | CASZ1 | 1 |  |  |  |  |  |  |  |  |  |  |  |  |  |  |  |  |  |  |  |  |  |  |  |  |  |  |  |  |  |  |  |  |  |  |  |  |  |  |  |  |  |  |  |  |  |  |  |  |  |  |  |  |  |  |  |  |  |  |  |  |  |  |  |  |  |  |  |  |  |  |  |  |  |  |  |  |  |  |  |  |  |  |  |  |  |  |  |  |  |  |  |  |  |  |  |  |  |  |  |  |  |  |  |  |  |  |  |  |  |  |  |  |  |  |  |  |  |  |  |  |  |  |  |  |  |  |  |  |  |  |  |  |  |  |  |  |  |  |  |  |  |  |  |  |  |  |  |  |  |  |  |  |  |  |  |  |  |  |  |  |  |  |  |  |  |  |  |  |  |  |  |  |  |  |  |  |  |  |  |  |  |  |  |  |  |  |  |  |  |  |  |  |  |  |  |  |  |  |  |  |  |  |  |  |  |  |  |  |  |  |  |  |  |  |  |  |  |  |  |  |  |  |  |  |  |  |  |  |  |  |  |  |  |  |  |  |  |  |  |  |  |  |  |  |  |  |  |  |  |  |  |  |  |  |  |  |  |  |  |  |  |  |  |  |  |  |  |  |  |  |  |  |  |  |  |  |  |  |  |  |  |  |  |  |  |  |  |  |  |  |  |  |  |  |  |  |  |  |  |  |  |  |  |  |  |  |  |  |  |  |  |  |  |  |  |  |  |  |  |  |  |  |  |  |  |  |  |  |  |  |  |  |  |  |  |  |  |  |  |  |  |  |  |  |  |  |  |  |  |  |  |  |  |  |  |  |  |  |  |  |  |  |  |  |  |  |  |  |  |  |  |  |  |  |  |  |  |  |  |  |  |  |  |  |  |  |  |  |  |  |  |  |  |  |  |  |  |  |  |  |  |  |  |  |  |  |  |  |  |  |  |  |  |  |  |  |  |  |  |  |  |  |  |  |  |  |  |  |  |  |  |  |  |  |  |  |  |  |  |  |  |  |  |  |  |  |  |  |  |  |  |  |  |  |  |  |  |  |  |  |  |  |  |  |  |  |  |  |  |  |  |  |  |  |  |  |  |  |  |  |  |  |  |  |  |  |  |  |  |  |  |  |  |  |  |  |  |  |  |  |  |  |  |  |  |  |  |  |  |  |  |  |  |  |  |  |  |  |  |  |  |  |  |  |  |  |  |  |  |  |  |  |  |  |  |  |  |  |  |  |  |  |  |  |  |  |  |  |  |  |  |  |  |  |  |  |  |  |  |  |  |  |  |  |  |  |  |  |  |  |  |  |  |  |  |  |  |  |  |  |  |  |  |  |  |  |  |  |  |  |  |  |  |  |  |  |  |  |  |  |  |  |  |  |  |  |  |  |  |  |  |  |  |  |  |  |  |  |  |  |  |  |  |  |  |  |  |  |  |  |  |  |  |  |  |  |  |  |  |  |  |  |  |  |  |  |  |  |  |  |  |  |  |  |  |  |  |  |  |  |  |  |  |  |  |  |  |  |  |  |  |  |  |  |  |  |  |  |  |  |  |  |  |  |  |  |  |  |  |  |  |  |  |  |  |  |  |  |  |  |  |  |  |  |  |  |  |  |  |  |  |  |  |  |  |  |  |  |  |  |  |  |  |  |  |  |  |  |  |  |  |  |  |  |  |  |  |  |  |  |  |  |  |  |  |  |  |  |  |  |  |  |  |  |  |  |  |  |  |  |  |  |  |  |  |  |  |  |  |  |  |  |  |  |  |  |  |  |  |  |  |  |  |  |  |  |  |  |  |  |  |  |  |  |  |  |  |  |  |  |  |  |  |  |  |  |  |  |  |  |  |  |  |  |  |  |  |  |  |  |  |  |  |  |  |  |  |  |  |  |  |  |  |  |  |  |  |  |  |  |  |  |  |  |  |  |  |  |  |  |  |  |  |  |  |  |  |  |  |  |  |  |  |  |  |  |  |  |  |  |  |  |  |  |  |  |  |  |  |  |  |  |  |  |  |  |  |  |  |  |  |  |  |  |  |  |  |  |  |  |  |  |  |  |  |  |  |  |  |  |  |  |  |  |  |  |  |  |  |  |  |  |  |  |  |  |  |  |  |  |  |  |  |  |  |  |  |  |  |  |  |  |  |  |  |  |  |  |  |  |  |  |  |  |  |  |  |  |  |  |  |  |  |  |  |  |  |  |  |  |  |  |  |  |  |  |  |  |  |  |  |  |  |  |  |  |  |  |  |  |  |  |  |  |  |  |  |  |  |  |  |  |  |  |  |  |  |  |  |  |  |  |  |  |  |  |  |  |  |  |  |  |  |  |  |  |  |  |  |  |  |  |  |  |  |  |  |  |  |  |  |  |  |  |  |  |  |  |  |  |  |  |  |  |  |  |  |  |  |  |  |  |  |  |  |  |  |  |  |  |  |  |  |  |  |  |  |  |  |  |  |  |  |  |  |  |  |  |  |  |  |  |  |  |  |  |  |  |  |  |  |  |  |  |  |  |  |  |  |  |  |  |  |  |  |  |  |  |  |  |  |  |  |  |  |  |  |  |  |  |  |  |  |  |  |  |  |  |  |  |  |  |  |  |  |  |  |  |  |  |  |  |  |  |  |  |  |  |  |  |  |  |  |  |  |  |  |  |  |  |  |  |  |  |  |  |  |  |  |  |  |  |  |  |  |  |  |  |  |  |  |  |  |  |  |  |  |  |  |  |  |  |  |  |  |  |  |  |  |  |  |  |  |  |  |  |  |  |  |  |  |  |  |  |  |  |  |  |  |  |  |  |  |  |  |  |  |  |  |  |  |  |  |  |  |  |  |  |  |  |  |  |  |  |  |  |  |  |  |  |  |  |  |  |  |  |  |  |  |  |  |  |  |  |  |  |  |  |  |  |  |  |  |  |  |  |  |  |  |  |  |  |  |  |  |  |  |  |  |  |  |  |  |  |  |  |  |  |  |  |  |  |  |  |  |  |  |  |  |  |  |  |  |  |  |  |  |  |  |  |  |  |  |  |  |  |  |  |  |  |  |  |  |  |  |  |  |  |  |  |  |  |  |  |  |  |  |  |  |  |  | </ |
|-----|-------|---|--|--|--|--|--|--|--|--|--|--|--|--|--|--|--|--|--|--|--|--|--|--|--|--|--|--|--|--|--|--|--|--|--|--|--|--|--|--|--|--|--|--|--|--|--|--|--|--|--|--|--|--|--|--|--|--|--|--|--|--|--|--|--|--|--|--|--|--|--|--|--|--|--|--|--|--|--|--|--|--|--|--|--|--|--|--|--|--|--|--|--|--|--|--|--|--|--|--|--|--|--|--|--|--|--|--|--|--|--|--|--|--|--|--|--|--|--|--|--|--|--|--|--|--|--|--|--|--|--|--|--|--|--|--|--|--|--|--|--|--|--|--|--|--|--|--|--|--|--|--|--|--|--|--|--|--|--|--|--|--|--|--|--|--|--|--|--|--|--|--|--|--|--|--|--|--|--|--|--|--|--|--|--|--|--|--|--|--|--|--|--|--|--|--|--|--|--|--|--|--|--|--|--|--|--|--|--|--|--|--|--|--|--|--|--|--|--|--|--|--|--|--|--|--|--|--|--|--|--|--|--|--|--|--|--|--|--|--|--|--|--|--|--|--|--|--|--|--|--|--|--|--|--|--|--|--|--|--|--|--|--|--|--|--|--|--|--|--|--|--|--|--|--|--|--|--|--|--|--|--|--|--|--|--|--|--|--|--|--|--|--|--|--|--|--|--|--|--|--|--|--|--|--|--|--|--|--|--|--|--|--|--|--|--|--|--|--|--|--|--|--|--|--|--|--|--|--|--|--|--|--|--|--|--|--|--|--|--|--|--|--|--|--|--|--|--|--|--|--|--|--|--|--|--|--|--|--|--|--|--|--|--|--|--|--|--|--|--|--|--|--|--|--|--|--|--|--|--|--|--|--|--|--|--|--|--|--|--|--|--|--|--|--|--|--|--|--|--|--|--|--|--|--|--|--|--|--|--|--|--|--|--|--|--|--|--|--|--|--|--|--|--|--|--|--|--|--|--|--|--|--|--|--|--|--|--|--|--|--|--|--|--|--|--|--|--|--|--|--|--|--|--|--|--|--|--|--|--|--|--|--|--|--|--|--|--|--|--|--|--|--|--|--|--|--|--|--|--|--|--|--|--|--|--|--|--|--|--|--|--|--|--|--|--|--|--|--|--|--|--|--|--|--|--|--|--|--|--|--|--|--|--|--|--|--|--|--|--|--|--|--|--|--|--|--|--|--|--|--|--|--|--|--|--|--|--|--|--|--|--|--|--|--|--|--|--|--|--|--|--|--|--|--|--|--|--|--|--|--|--|--|--|--|--|--|--|--|--|--|--|--|--|--|--|--|--|--|--|--|--|--|--|--|--|--|--|--|--|--|--|--|--|--|--|--|--|--|--|--|--|--|--|--|--|--|--|--|--|--|--|--|--|--|--|--|--|--|--|--|--|--|--|--|--|--|--|--|--|--|--|--|--|--|--|--|--|--|--|--|--|--|--|--|--|--|--|--|--|--|--|--|--|--|--|--|--|--|--|--|--|--|--|--|--|--|--|--|--|--|--|--|--|--|--|--|--|--|--|--|--|--|--|--|--|--|--|--|--|--|--|--|--|--|--|--|--|--|--|--|--|--|--|--|--|--|--|--|--|--|--|--|--|--|--|--|--|--|--|--|--|--|--|--|--|--|--|--|--|--|--|--|--|--|--|--|--|--|--|--|--|--|--|--|--|--|--|--|--|--|--|--|--|--|--|--|--|--|--|--|--|--|--|--|--|--|--|--|--|--|--|--|--|--|--|--|--|--|--|--|--|--|--|--|--|--|--|--|--|--|--|--|--|--|--|--|--|--|--|--|--|--|--|--|--|--|--|--|--|--|--|--|--|--|--|--|--|--|--|--|--|--|--|--|--|--|--|--|--|--|--|--|--|--|--|--|--|--|--|--|--|--|--|--|--|--|--|--|--|--|--|--|--|--|--|--|--|--|--|--|--|--|--|--|--|--|--|--|--|--|--|--|--|--|--|--|--|--|--|--|--|--|--|--|--|--|--|--|--|--|--|--|--|--|--|--|--|--|--|--|--|--|--|--|--|--|--|--|--|--|--|--|--|--|--|--|--|--|--|--|--|--|--|--|--|--|--|--|--|--|--|--|--|--|--|--|--|--|--|--|--|--|--|--|--|--|--|--|--|--|--|--|--|--|--|--|--|--|--|--|--|--|--|--|--|--|--|--|--|--|--|--|--|--|--|--|--|--|--|--|--|--|--|--|--|--|--|--|--|--|--|--|--|--|--|--|--|--|--|--|--|--|--|--|--|--|--|--|--|--|--|--|--|--|--|--|--|--|--|--|--|--|--|--|--|--|--|--|--|--|--|--|--|--|--|--|--|--|--|--|--|--|--|--|--|--|--|--|--|--|--|--|--|--|--|--|--|--|--|--|--|--|--|--|--|--|--|--|--|--|--|--|--|--|--|--|--|--|--|--|--|--|--|--|--|--|--|--|--|--|--|--|--|--|--|--|--|--|--|--|--|--|--|--|--|--|--|--|--|--|--|--|--|--|--|--|--|--|--|--|--|--|--|--|--|--|--|--|--|--|--|--|--|--|--|--|--|--|--|--|--|--|--|--|--|--|--|--|--|--|--|--|--|--|--|--|--|--|--|--|--|--|--|--|--|--|--|--|--|--|--|--|--|--|--|--|--|--|--|--|--|--|--|--|--|--|--|--|--|--|--|--|--|--|--|--|--|--|--|--|--|--|--|--|--|--|--|--|--|--|--|--|--|--|--|--|--|--|--|--|--|--|--|--|--|--|--|--|--|--|--|--|--|--|--|--|--|--|--|--|--|--|--|--|--|--|--|--|--|--|--|--|--|--|--|--|--|--|--|--|--|--|--|--|--|--|--|--|--|--|--|--|--|--|--|--|--|--|--|--|--|--|--|--|--|--|--|--|--|--|--|--|--|--|--|--|--|--|--|--|--|--|--|--|--|--|--|--|--|--|--|--|--|--|--|--|--|--|--|--|--|--|--|--|--|--|--|--|--|--|--|--|--|--|--|--|--|--|--|--|--|--|--|--|--|--|--|--|--|--|--|--|--|--|--|--|--|--|--|--|--|--|----|

| Gene         | Count | Category |
|--------------|-------|----------|
| 261 TAF1     | 2     | Blue     |
| 262 DDX3X    | 3     | Blue     |
| 263 JAK1     | 2     | Blue     |
| 264 LAMA2    | 2     | Blue     |
| 265 ABCC2    | 1     | Blue     |
| 266 CHD7     | 1     | Blue     |
| 267 ERBB3    | 1     | Blue     |
| 268 H3F3A    | 1     | Blue     |
| 269 INPP4B   | 1     | Blue     |
| 270 ROS1     | 1     | Blue     |
| 271 SOS1     | 1     | Blue     |
| 272 FLT3     | 1     | Blue     |
| 273 KIT      | 1     | Blue     |
| 274 RPS6KB1  | 1     | Blue     |
| 275 PLXNA1   | 1     | Blue     |
| 276 PLEC     | 1     | Blue     |
| 277 VPS8     | 1     | Blue     |
| 278 TACC2    | 1     | Blue     |
| 279 RYR3     | 1     | Blue     |
| 280 OTOG     | 1     | Blue     |
| 281 KIAA1109 | 1     | Blue     |
| 282 JRK      | 1     | Blue     |
| 283 FBN3     | 1     | Blue     |
| 284 DNAH14   | 1     | Blue     |
| 285 CUX1     | 1     | Blue     |
| 286 BIRC5    | 1     | Blue     |
| 287 AK5      | 1     | Blue     |
| 288 SMARCAL1 | 1     | Blue     |
| 289 PIK3R1   | 1     | Blue     |
| 290 IQCG     | 1     | Blue     |
| 291 METTL24  | 1     | Blue     |
| 292 IFI27    | 1     | Blue     |
| 293 HLA-B    | 1     | Blue     |
| 294 FGF2     | 1     | Blue     |
| 295 FGF8     | 1     | Blue     |
| 296 MED1     | 1     | Blue     |
| 297 IRF6     | 1     | Blue     |
| 298 EZH2     | 1     | Blue     |
| 299 RIPK4    | 1     | Blue     |
| 300 DICER1   | 1     | Blue     |
| 301 BCL2L1   | 1     | Blue     |
| 302 HPV 16   | 1     | Blue     |
| 303 EVER 1   | 1     | Blue     |
| 304 EVER 2   | 1     | Blue     |
| 305 P53      | 4     | Blue     |
| 306 XRCC1    | 1     | Blue     |
| 307 XRCC3    | 1     | Blue     |
| 308 XPC      | 1     | Blue     |
| 309 XPD      | 1     | Blue     |
| 310 IGF1     | 1     | Blue     |
| 311 IGF2     | 1     | Blue     |
| 312 HER2     | 1     | Blue     |
| 313 HER3     | 1     | Blue     |
| 314 PHF2     | 1     | Blue     |
| 315 FANCC    | 1     | Blue     |
| 316 CDKM2C   | 1     | Blue     |
| 317 WNT10B   | 1     | Blue     |
| 318 CEBPA    | 1     | Blue     |
| 319 MAP3K8   | 1     | Blue     |
| 320 FGR      | 1     | Blue     |
| 321 GATA1    | 1     | Blue     |
| 322 OL4      | 1     | Blue     |
| 323 PDGFA    | 1     | Blue     |
| 324 E2F2     | 1     | Blue     |
| 325 LOH      | 1     | Blue     |
| 326 PIK3R2   | 1     | Blue     |
| 327 CHEK2    | 1     | Blue     |
| 328 ARID1A   | 1     | Blue     |
| 329 FANCM    | 1     | Blue     |
| 330 NOTCH 4  | 1     | Blue     |
